# Supplementary material
Source: publisher figshare collection journal article supplement (https://diabetesjournals.figshare.com/ndownloader/files/32118215)
Supplement: Supplementary file 1 [file 32118215]

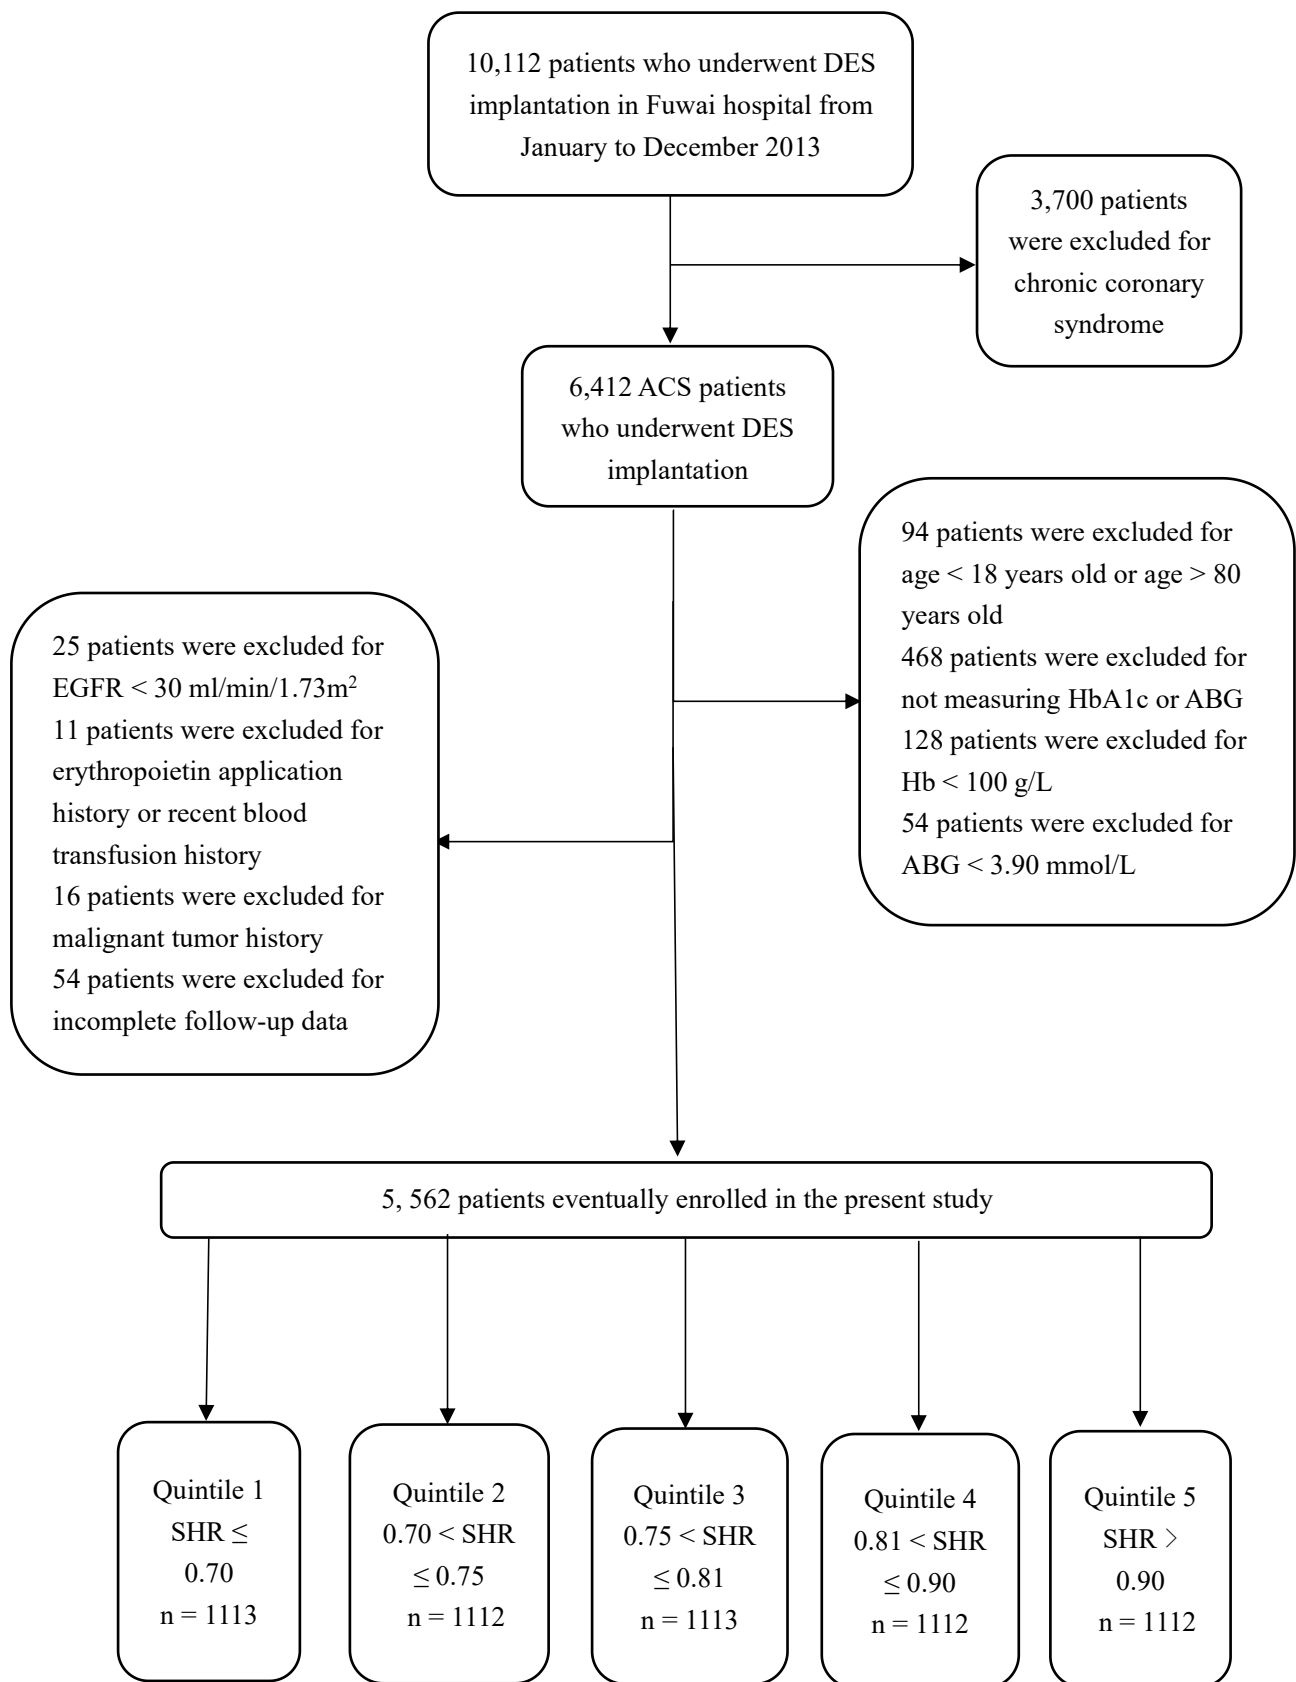

Supplementary Figure 1. Flowchart of the study population enrollment

ACS, acute coronary syndrome; DES, drug-eluting stent; HbA1c, hemoglobin A1c; ABG, admission blood glucose; Hb, hemoglobin; EGFR, estimated glomerular filtration rate; SHR, stress hyperglycemia ratio.
